# Supplementary material
Source: PubMed Central journal article supplement (PMC4411956)
Supplement: NIHMS676797-supplement-supplemental.pdf [file NIHMS676797-supplement-supplemental.pdf]

## Supplementary Online Content

Muzaale A, Massie A, Wang M-C, et al. Risk of End-Stage Renal Disease Following Live Kidney Donation. *JAMA*. doi:10.1001/JAMA.2013.285141.

**eAppendix 1.** Exclusion Criteria for Healthy Nondonors Drawn From the NHANES III

**eAppendix 2.** Creating Matched Nondonor Cohorts

This supplementary material has been provided by the authors to give readers additional information about their work.

**eAppendix 1:** Exclusion Criteria for Healthy Nondonors Drawn From the NHANES III

(NOTE: patients were excluded who answered "Yes" to any of these questions)

Survey Questions

No health insurance because of poor health, illness, age  
Doctor told you that you had congestive heart failure  
Doctor ever told you that you had a stroke  
Doctor ever told you that you had lupus  
Doctor ever told you that you had asthma  
Doctor ever told you that you had cancer other than skin cancer  
Doctor ever told you that you had a heart attack  
Doctor ever told you that you had hypertension/HBP  
Ever been told you have sugar/diabetes  
Get chest pain while walking uphill or in a hurry  
Get chest pain while walking at ordinary pace  
Get leg pain while walking at an ordinary pace  
Difficulty walking a quarter of a mile  
Difficulty walking 10 steps without rest  
Difficulty lifting or carrying 10 pounds  
Difficulty doing chores around the house  
Difficulty preparing own meals  
Difficulty managing your money  
Difficulty walking room to room, 1 level  
Difficulty standing from armless chair  
Difficulty getting in or out of bed  
Difficulty eating  
Difficulty dressing yourself  
Do you need help with personal care needs  
Do you need help in handling routine needs  
Do you use a device to help get around: cane, etc.  
Do you use any special eating utensils  
Do you use aids or devices to help you dress  
Have you ever had kidney stones

## **Appendix 2.** Creating Matched Nondonor Cohorts

Each live kidney donor was matched to one nondonor participant drawn, with replacement, from the “healthy” and “unscreened” nondonor subgroups of NHANES-III. Matching was based on donor age, sex, race/ethnicity, education background, BMI at the time of enrollment, history of cigarette smoking, and SBP. Age at donation and pre-operative characteristics (BMI, SBP) were matched to age and characteristics at the time of enrollment into NHANES-III. Exact matches were required for gender, race/ethnicity, and history of cigarette smoking (with the assumption of a non-smoker if donor information was not available). Progressive radius matching was used for age, BMI, SBP, and for educational background. In other words, matching with an ideal radius was attempted (age  $\pm 1$  year; BMI  $\pm 2$ ; SBP  $\pm 5$ ; education  $\pm 1$  level). If a matched non-donor could not be found using the ideal radius for a given characteristic, the acceptable radius was increased iteratively (one unit at a time) to a predetermined maximum permissible radius (Age  $\pm 5$  years; BMI  $\pm 5$ ; SBP  $\pm 5$ ; education  $\pm 2$  levels). If an acceptable BMI could not be found, matching to a participant with BMI 20-30 was performed. Similarly, if live donor SBP was not available, a match was selected from those with SBP between 100-140. Sampling with replacement was performed when a matched participant was the only available “fit” after failed attempts at ideal and radius matching.
